# Supplementary material for: Synchronous stabilization of Li–S electrodes by a 1T MoS2@AAO functional interlayer
Source: Royal Society of Chemistry journal article supplement (doi:10.1039/d3ta06263e), 2023-12-20
Supplement: d3ta06263e1.pdf [file d3ta06263e1.pdf]

## Supporting Information

### Synchronous stabilization of Li-S electrodes by 1T MoS<sub>2</sub>@AAO functional interlayer

Binchao Shi, Yue Wang, Ertai Liu, Shilin Mei,\* and Chang-Jiang Yao\*

State Key Laboratory of Explosion Science and Technology, Beijing Institute of Technology,

Beijing 100081 P. R. China.

\* E-mail: shilin.mei@bit.edu.cn; cjyao@bit.edu.cn

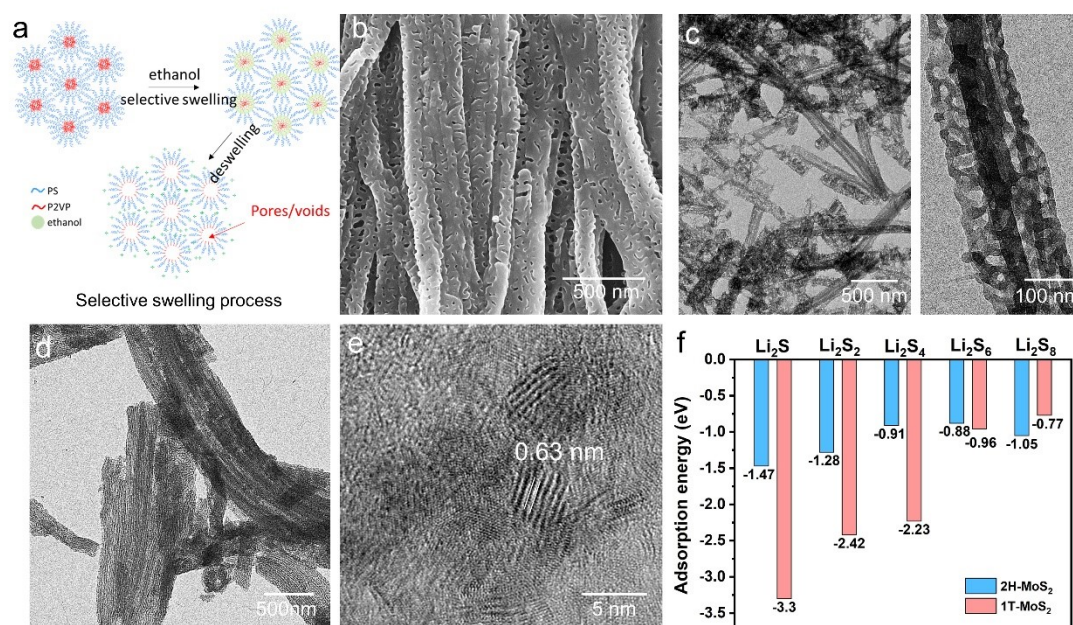

**Figure S1.** (a) The schematic picture of selective swelling process. (b) SEM images of PS-*b*-P2VP nanotubes. (c) TEM images of the PS-P2VP porous structures. (d) Low resolution TEM images of the MoS<sub>2</sub> nanotubes after dissolving AAO. (e) High resolution TEM images of the MoS<sub>2</sub> tubes after dissolving AAO. (f) Calculated adsorption energy of 1T and 2H phase MoS<sub>2</sub> to lithium polysulfides in previous research.

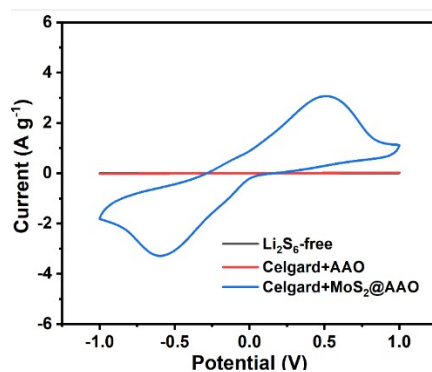

**Figure S2.** CV curves at a scan rate of  $10 \text{ mV s}^{-1}$  from -1.0 to 1.0 V of the symmetric batteries with different electrodes with and without the presence of  $\text{Li}_2\text{S}_6$ .

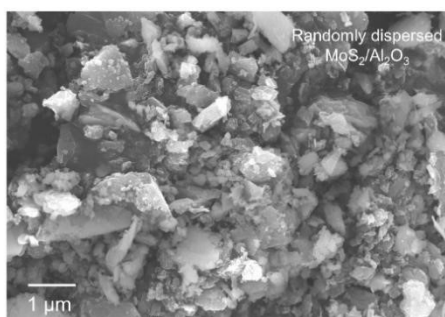

**Figure S3.** SEM images of randomly mixed  $\text{MoS}_2/\text{Al}_2\text{O}_3$  without the vertical channels.

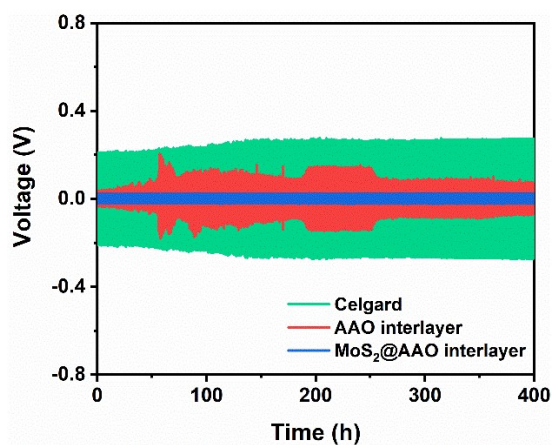

**Figure S4.** Voltage profile of the three symmetric cells at  $5 \text{ mAh cm}^{-2}$ .

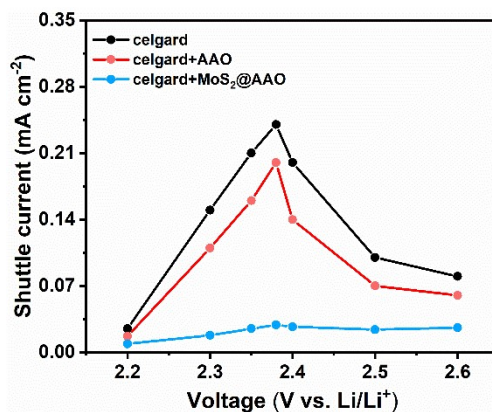

**Figure S5.** The shuttle currents of Li–S cells with Celgard, Celgard+AAO, and Celgard +MoS<sub>2</sub>@AAO.

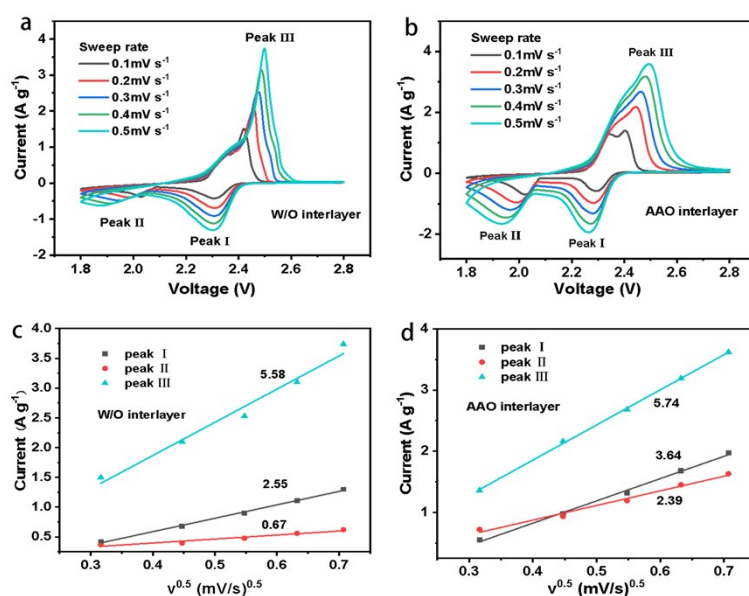

**Figure S6.** CV curves (a, b) and redox peak current dependence on the square root of the scan rate (c, d) of batteries based on Celgard, Celgard with AAO at different scan rate from 0.1 mV s<sup>-1</sup> to 0.5 mV s<sup>-1</sup>.

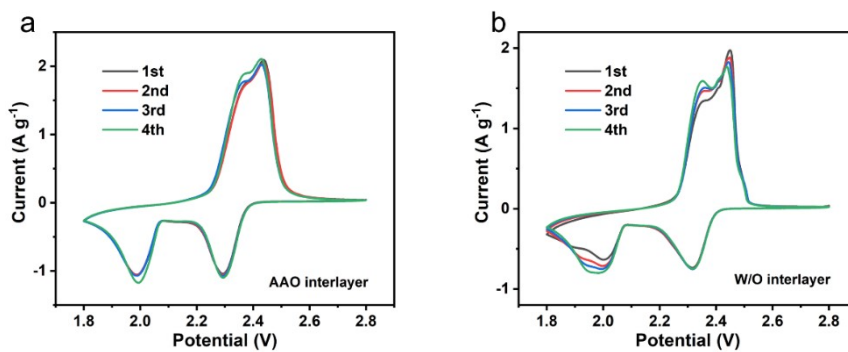

**Figure S7.** CV curves of different Li-S battery. Celgard with AAO (a) and Celgard (b) at  $0.2 \text{ mV s}^{-1}$ .

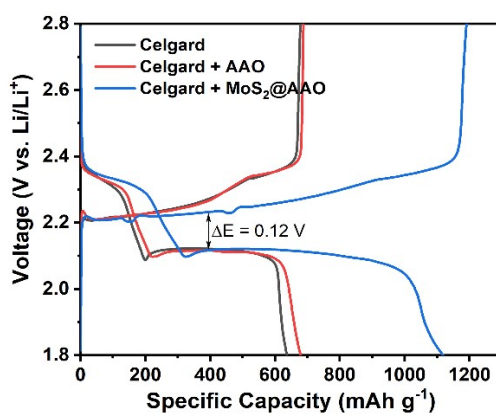

**Figure S8.** Charge/discharge profiles of Li-S battery with  $\text{MoS}_2\text{@AAO}$  interlayer (a), Celgard with AAO (b), and Celgard (c) at  $0.1 \text{ C}$ .

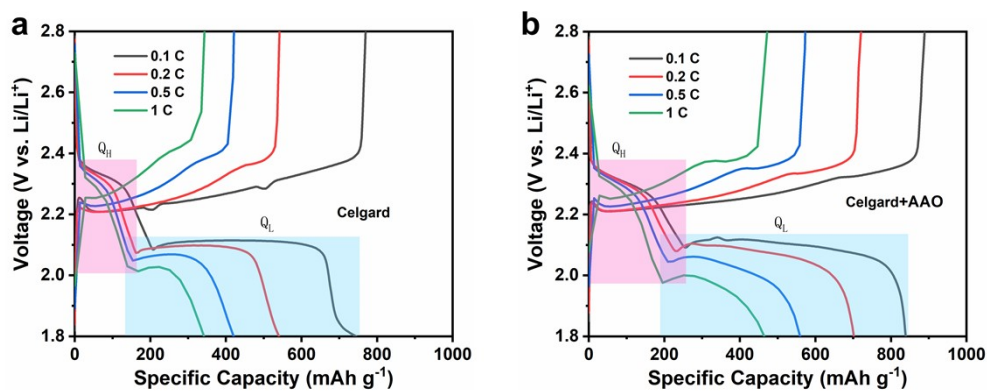

**Figure S9.** Charge/discharge profiles of Celgard (a) and Celgard with AAO (b) from  $0.1$  to  $1 \text{ C}$ .

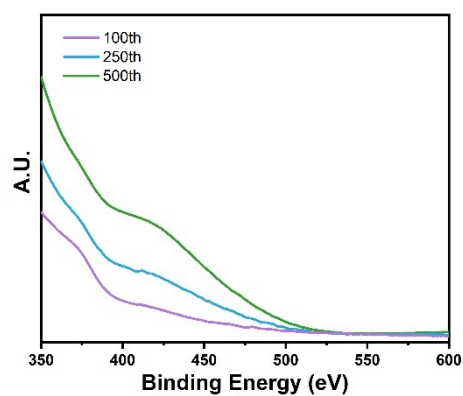

**Figure S10.** UV-vis spectra of the polysulfides released from the cycled MoS<sub>2</sub>@AAO membranes.

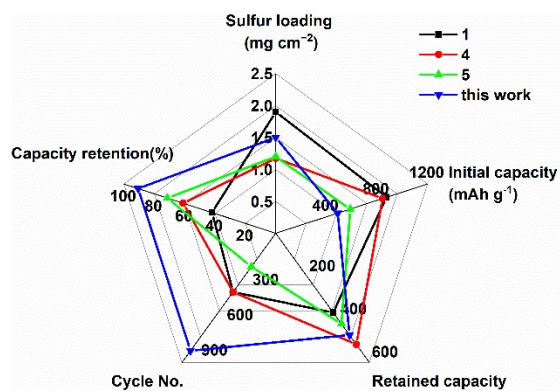

**Figure S11.** Comparison of the electrochemical performance of recently reported work in Li-S batteries.

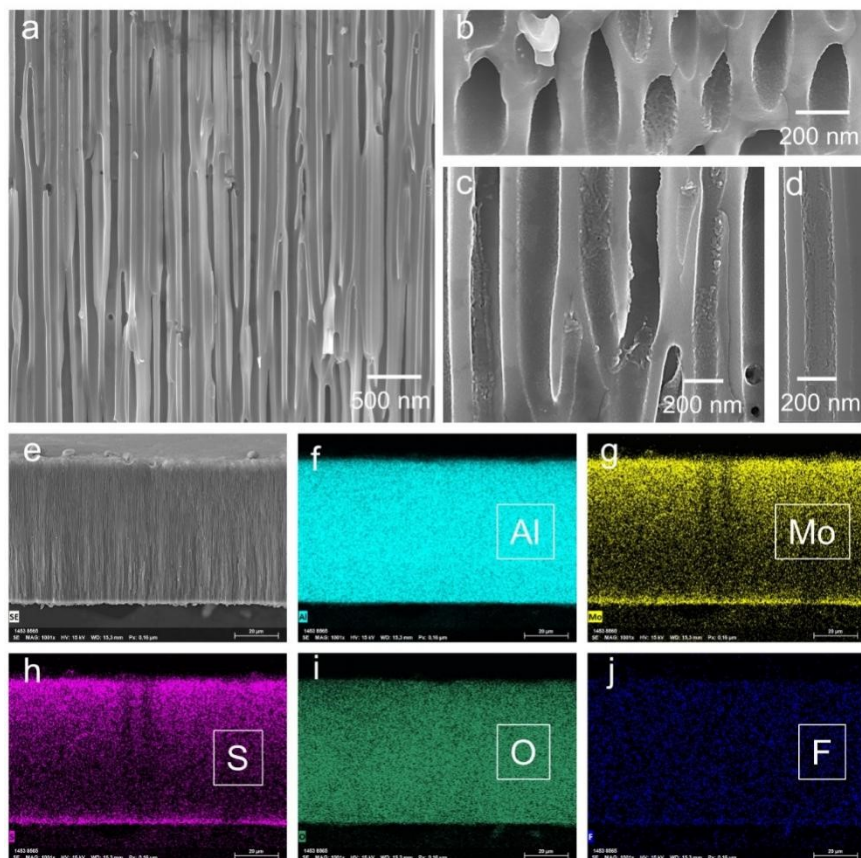

**Figure S12.** The SEM and the corresponding EDS mapping images of MoS<sub>2</sub>@AAO after cycling.

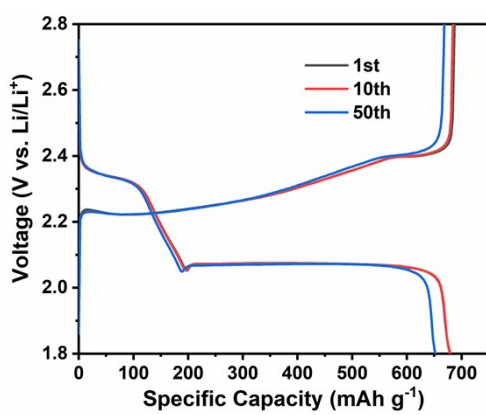

**Figure S13.** Charge/discharge profiles of Celgard with MoS<sub>2</sub>@AAO cells at 0.1 C with a high sulfur loading of =5.0 mg cm<sup>-2</sup> and E/S=7 μL mg<sup>-2</sup>.

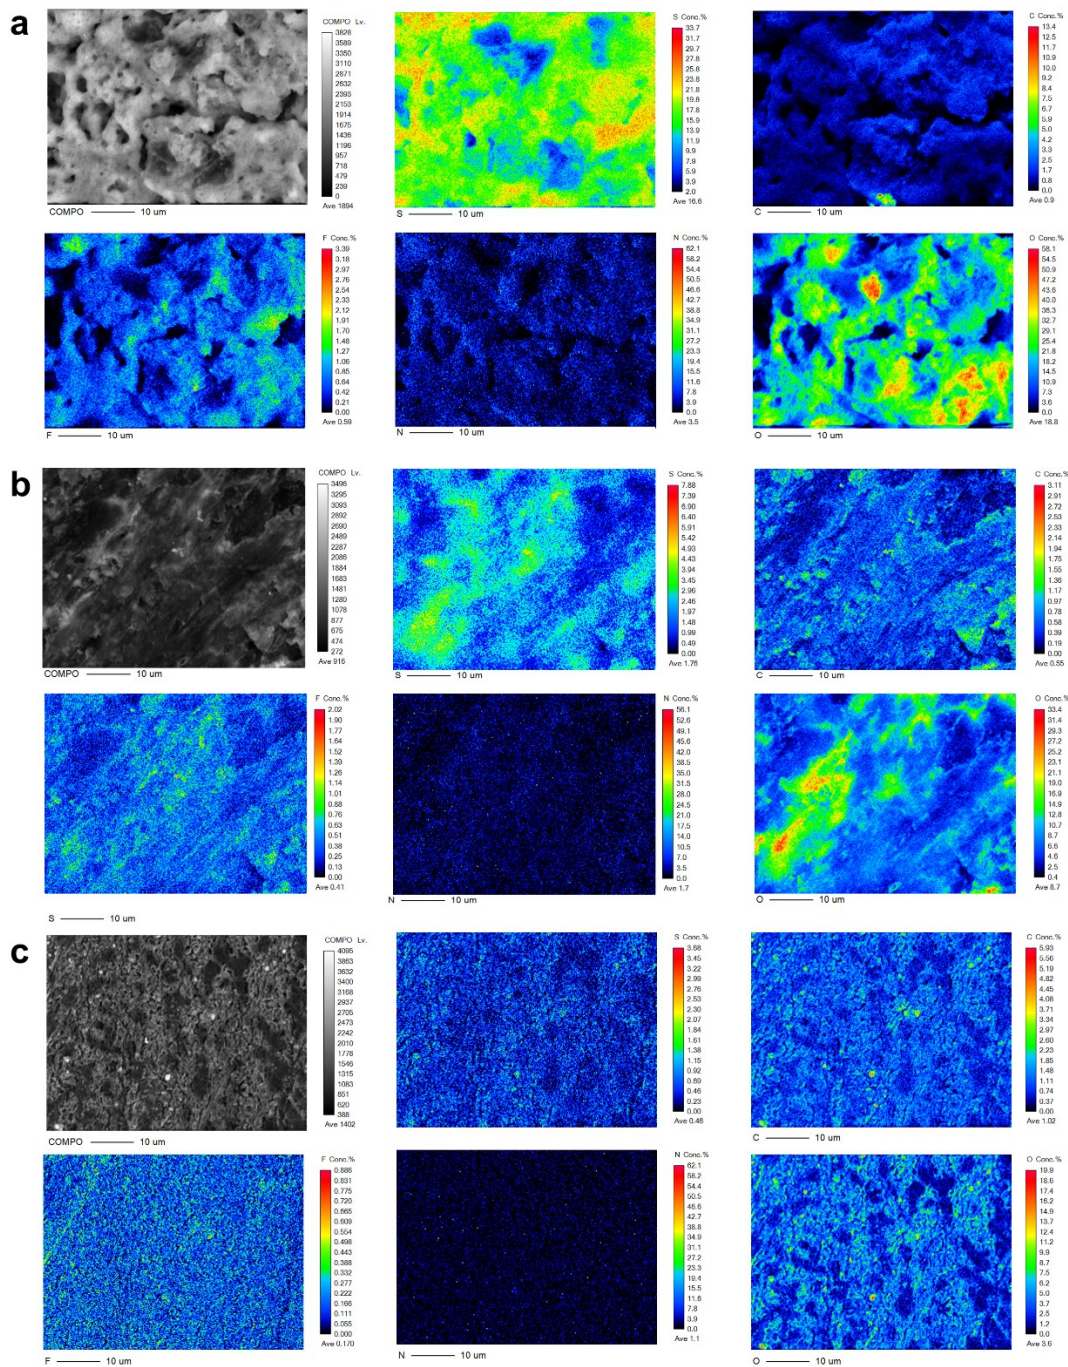

**Figure S14.** EPMA mapping of the Li anode of (a) Celgard, (b) Celgard with AAO, and (c) Celgard with MoS<sub>2</sub>@AAO cells after 50 cycles.

**Table S1. A summary of the electrochemical performances of representative works**

| Interlayer materials       | Sulfur loading (mg cm <sup>-2</sup> ) | Initial/highest capacity (mAh g <sup>-1</sup> ) | Retained capacity (mAh g <sup>-1</sup> ) | Cycle number | Capacity retention (%) | C rate       | Ref.             |
|----------------------------|---------------------------------------|-------------------------------------------------|------------------------------------------|--------------|------------------------|--------------|------------------|
| rGO@MoS <sub>2</sub>       | 1.8-2.0                               | 1121                                            | 671                                      | 200          | 59.8                   | 0.2 C        | 1                |
|                            |                                       | 877                                             | 368                                      | 500          | 42.0                   | 1 C          |                  |
| MoS <sub>2</sub> /CNT      | 1.4                                   | 1250                                            | 770                                      | 200          | 61.6                   | 0.2 C        | 2                |
|                            |                                       | 1237                                            | 648                                      | 500          | 52.4                   | 0.5 C        |                  |
| MoS <sub>2</sub> @CMT      | 1.0                                   | 1133                                            | 765                                      | 500          | 67.5                   | 0.5 C        | 3                |
| CNNFs-MoS <sub>2</sub> /PP | 1.1-1.25                              | 845.4                                           | 515.7                                    | 500          | 61.0                   | 1 C          | 4                |
| AAO                        | 1.2                                   | 1334.7                                          | 958.4                                    | 100          | 71.8                   | 0.2 C        | 5                |
|                            |                                       | 589.6                                           | 421.2                                    | 285          | 71.4                   | 1 C          |                  |
| <b>MoS<sub>2</sub>@AAO</b> | <b>1.5</b>                            | <b>901</b>                                      | <b>897</b>                               | <b>500</b>   | <b>99.6</b>            | <b>0.2 C</b> | <b>This work</b> |
|                            |                                       | <b>491</b>                                      | <b>472</b>                               | <b>1000</b>  | <b>90.6</b>            | <b>1 C</b>   |                  |

### References:

- [1] L. Tan, X. Li, Z. Wang, H. Guo, J. Wang, *ACS Appl. Mater. Interfaces* **2018**, *10*, 3707.
- [2] L. Yan, N. Luo, W. Kong, S. Luo, H. Wu, K. Jiang, Q. Li, S. Fan, W. Duan, J. Wang, *J. Power Sources* **2018**, *389*, 169.
- [3] J. Yang, L. Yu, B. Zheng, N. Li, J. Xi, X. Qiu, *Advanced Science* **2020**, *7*, 1903260.
- [4] K. Gao, D. Xia, H. Ji, Y. Chen, L. Zhang, Y. Wang, S. Yi, Y. Zhou, Z. Zhang, D. Chen, Y. Gao, *Energy Fuels* **2021**, *35*, 10303.
- [5] B. Wang, W. Guo, Y. Fu, *ACS Appl. Mater. Interfaces* **2020**, *12*, 5831.
